# Supplementary material
Source: publisher figshare collection journal article supplement (https://tandf.figshare.com/ndownloader/files/12822065)

**Synthesis of bioactive heterocycles using reusable heterogeneous catalyst HClO4-SiO2 under solvent free conditions**

Leimajam Vartima Chanua, Thokchom Prasanta Singha, Laishram Ronibala Devib, Okram Mukherjee Singha*

*a Chemistry Department, Manipur University, Canchipu-795003, Manipur*

*b National Institute of Technology, Lamphel-795004, Manipur*

**e-mail: ok_mukherjee@yahoo.co.in*

**1H NMR &13 C NMR of Compounds 3a-e and 4a-k**


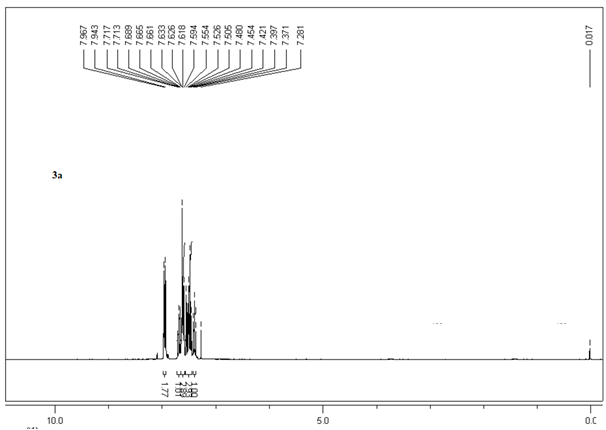


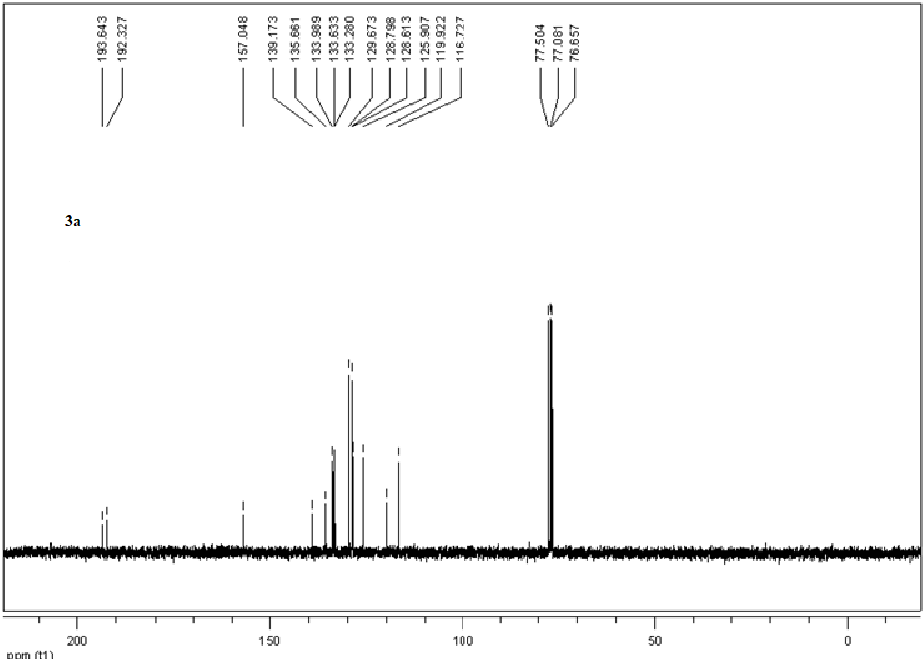


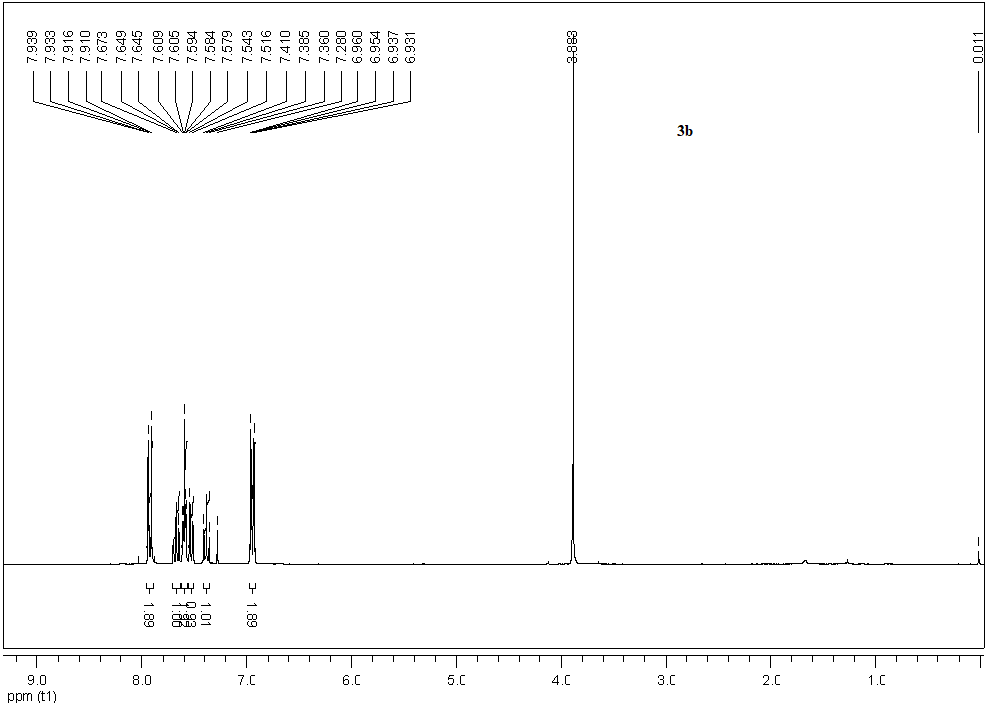


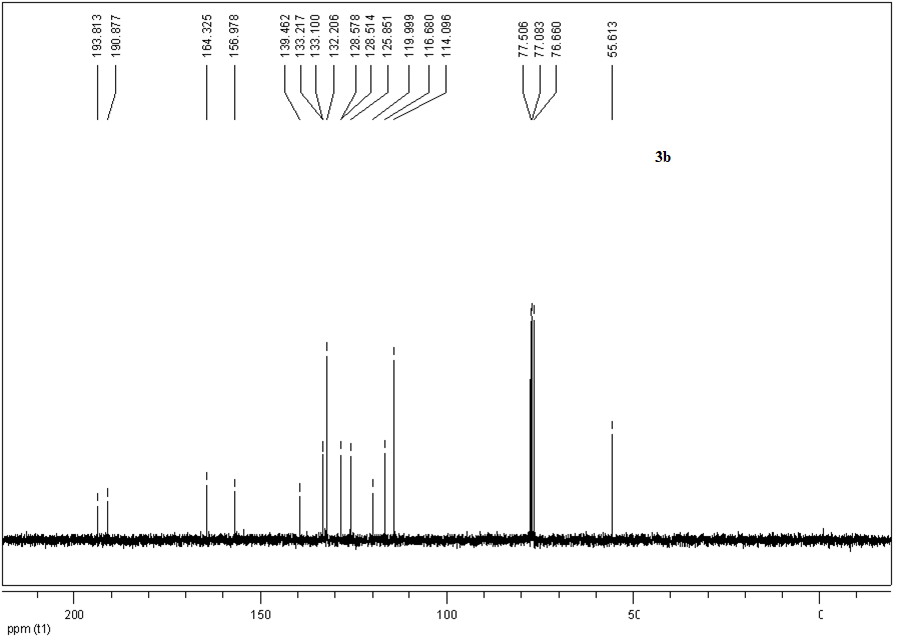


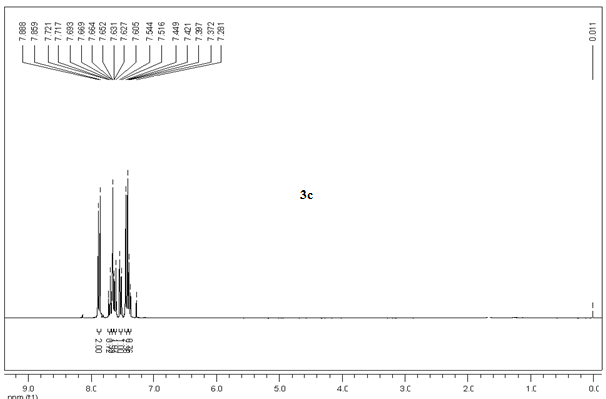


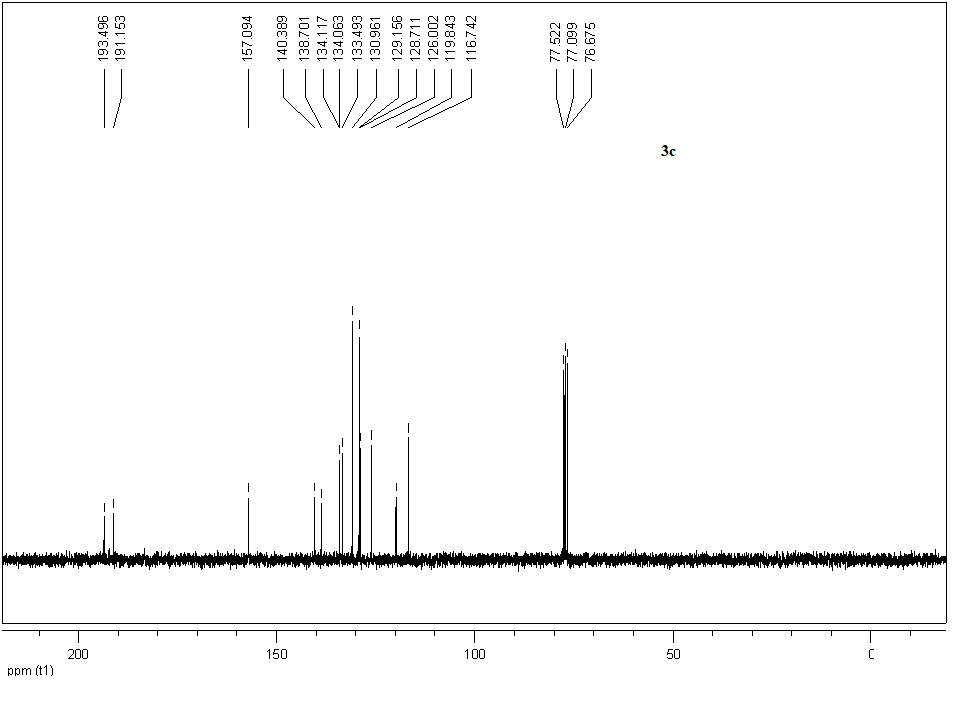


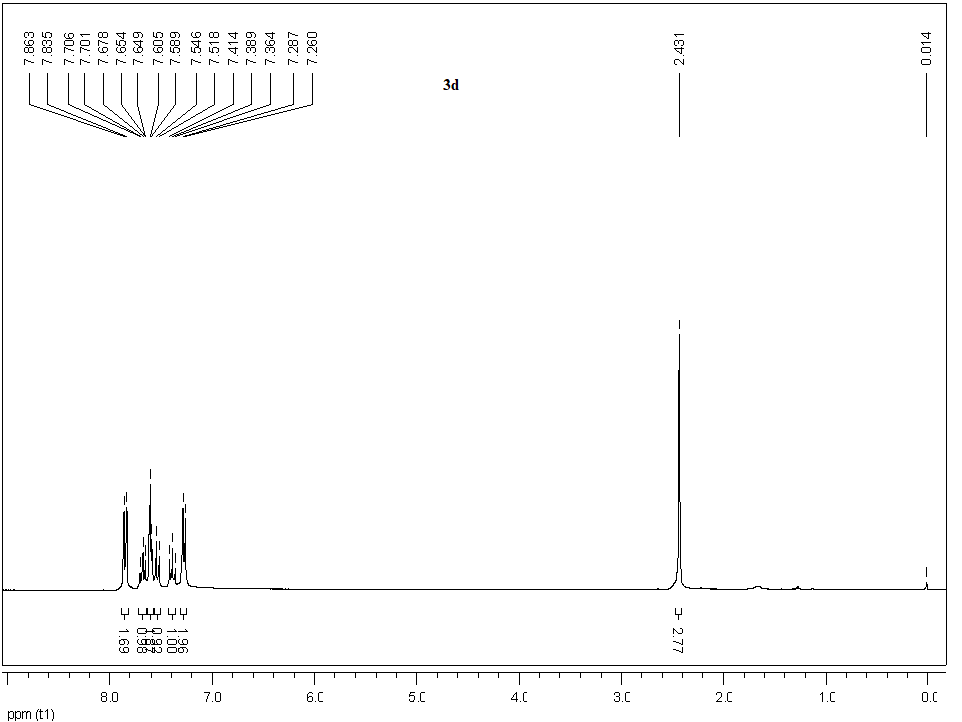


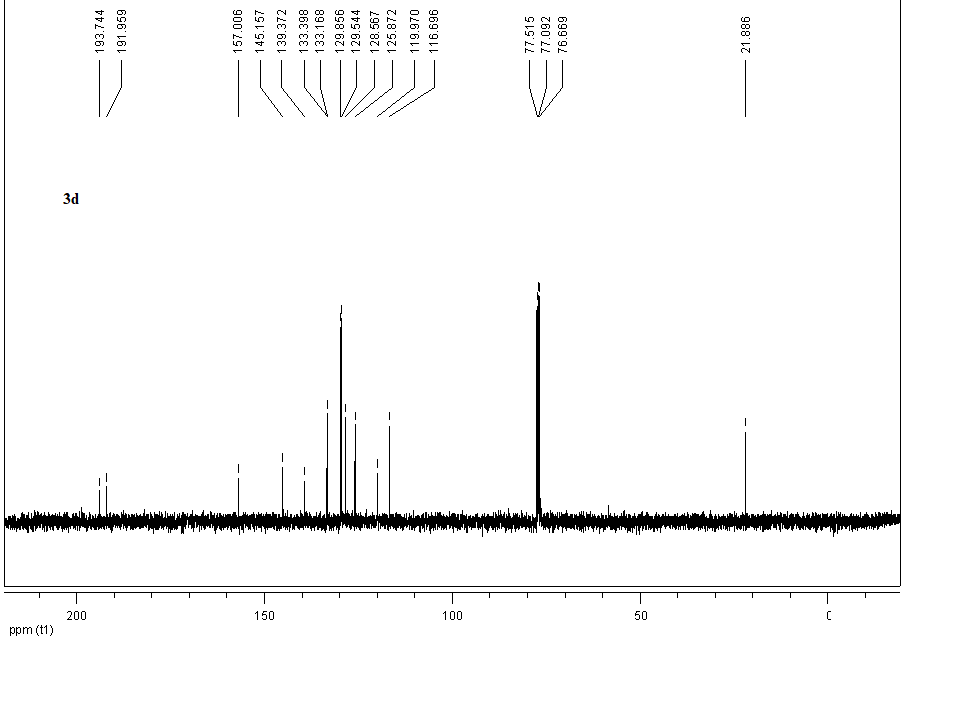


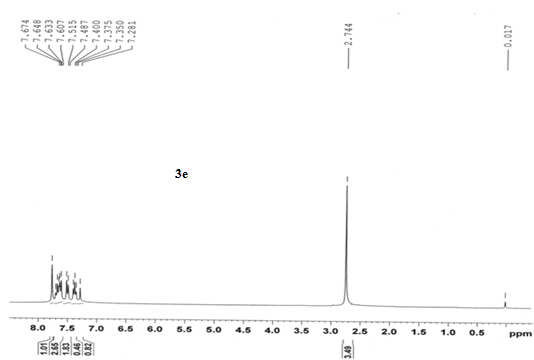


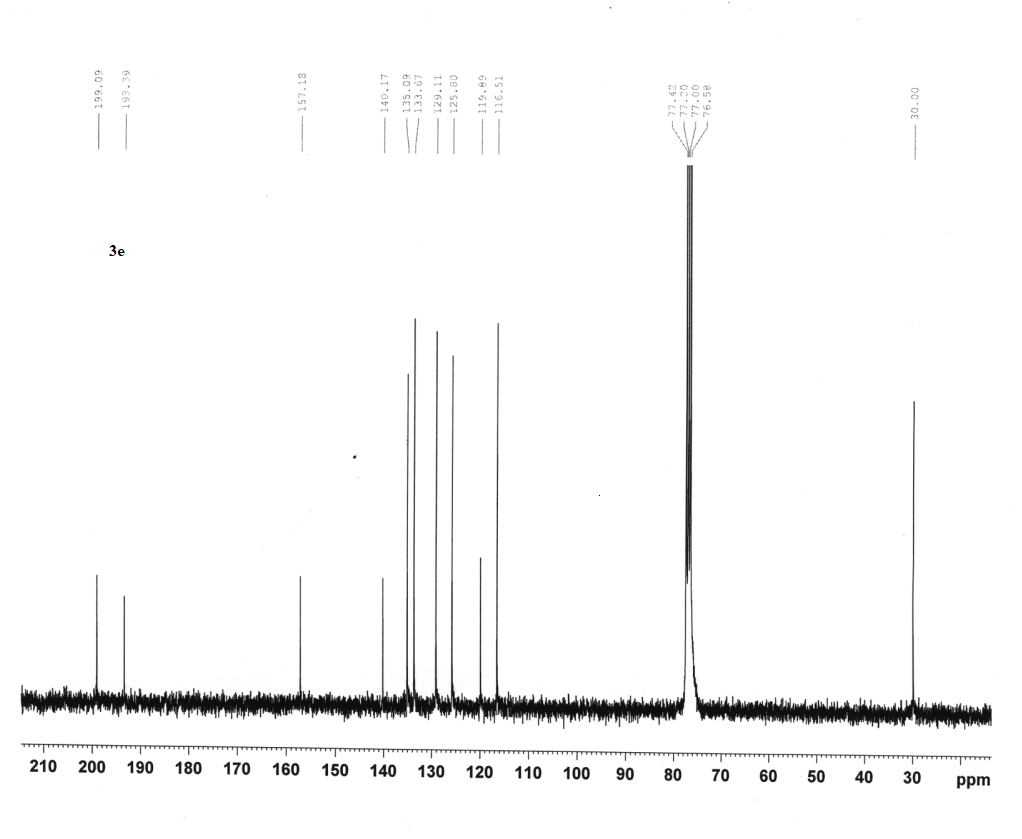


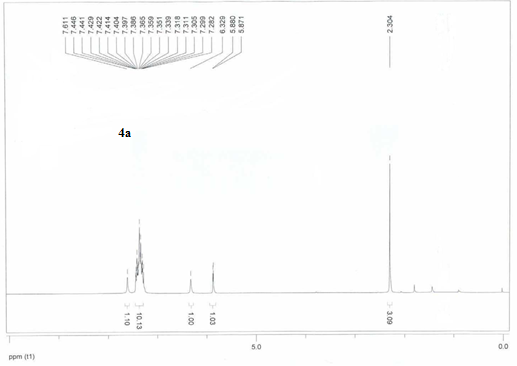


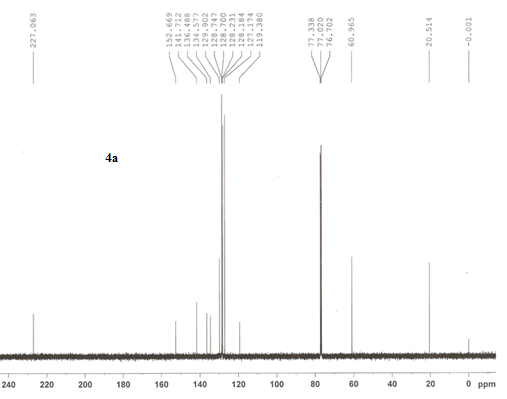


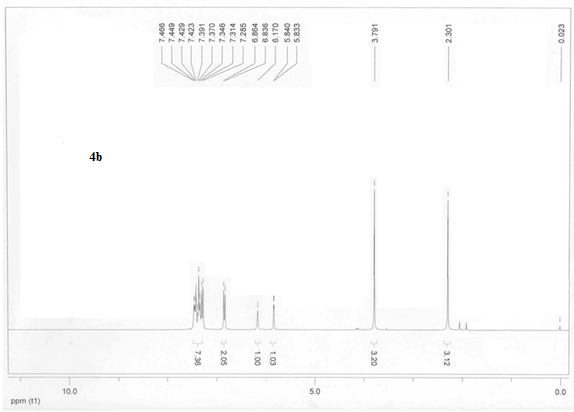


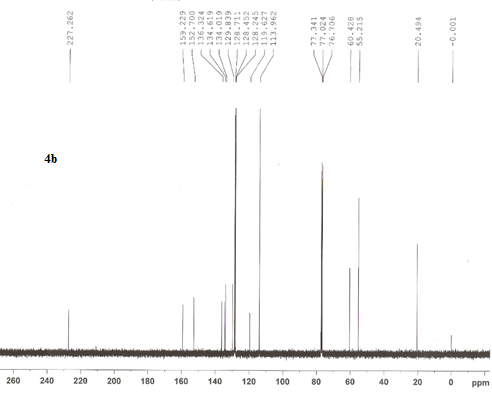


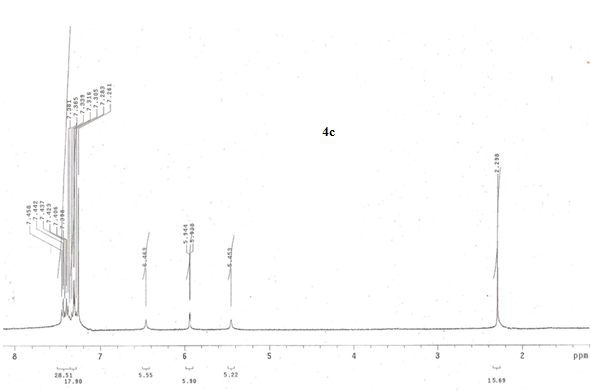


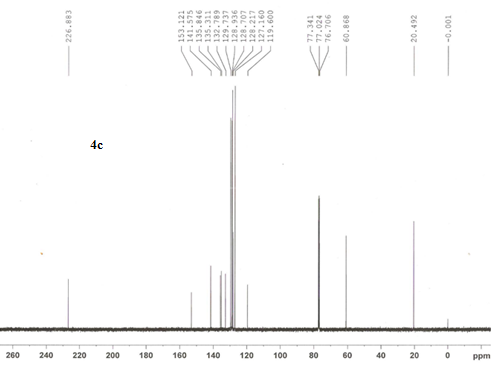


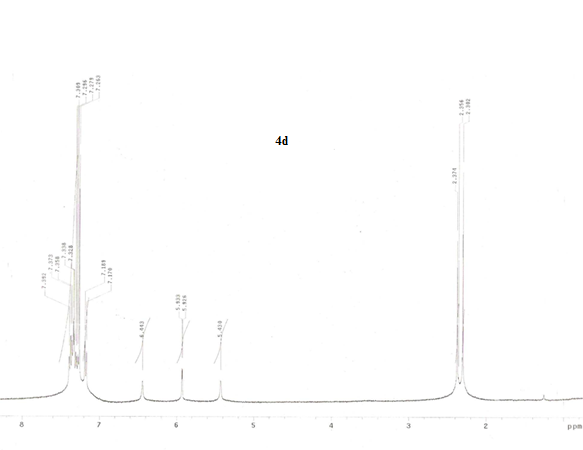


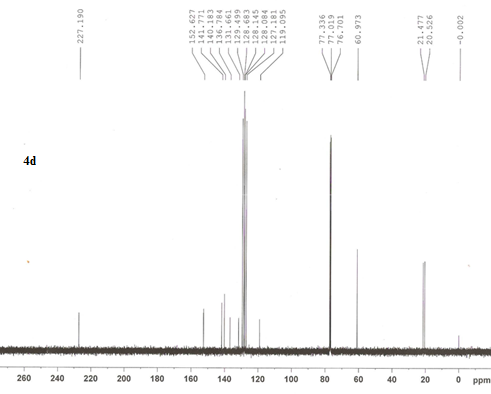


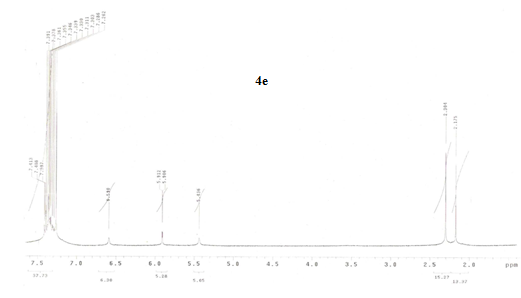


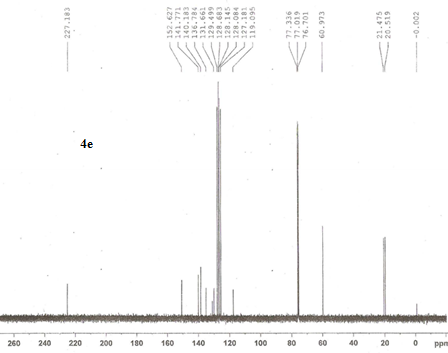


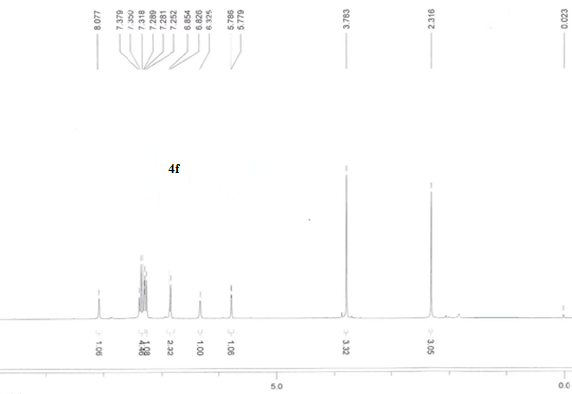


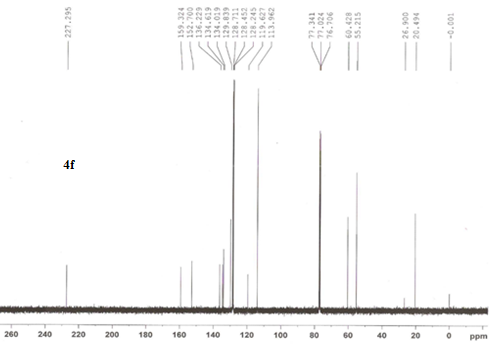


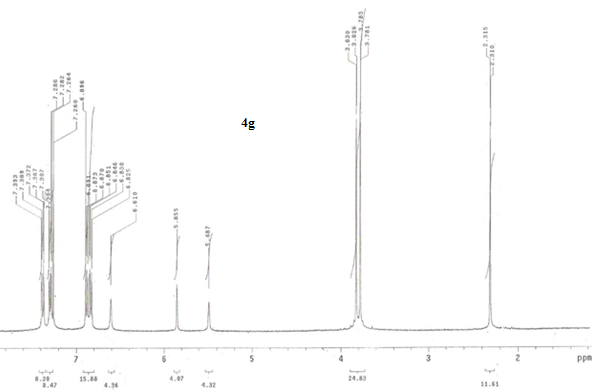


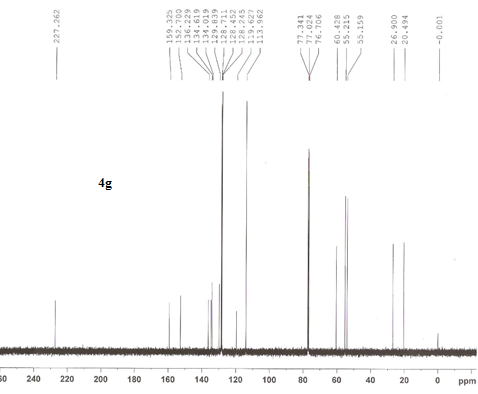


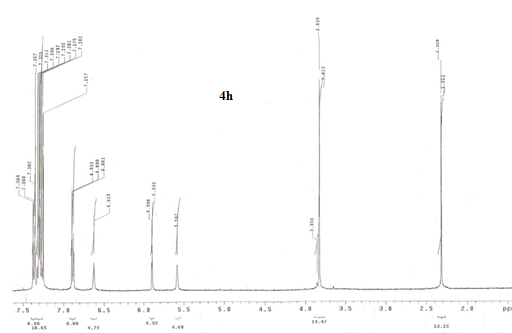


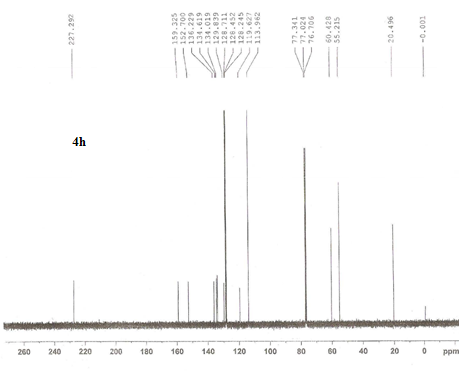


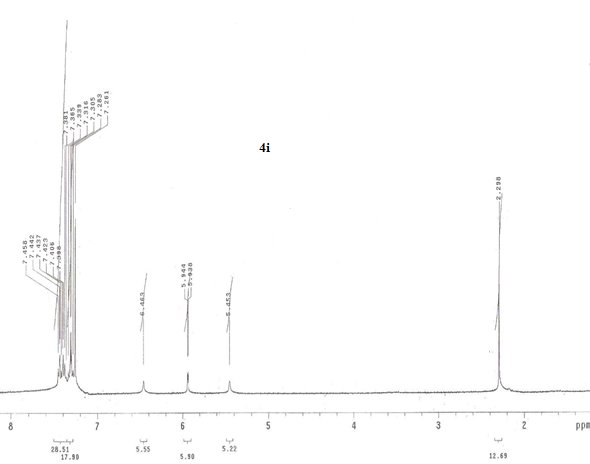


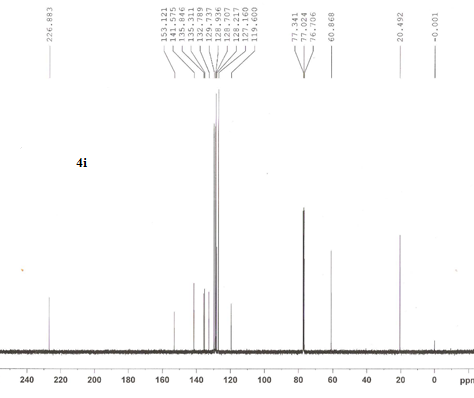


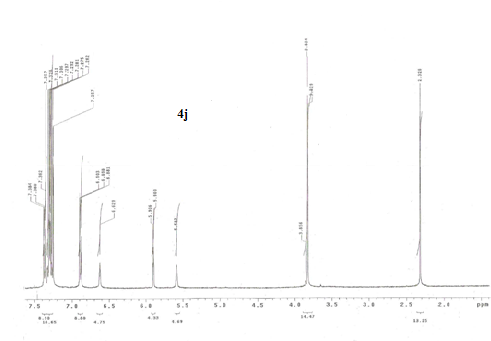


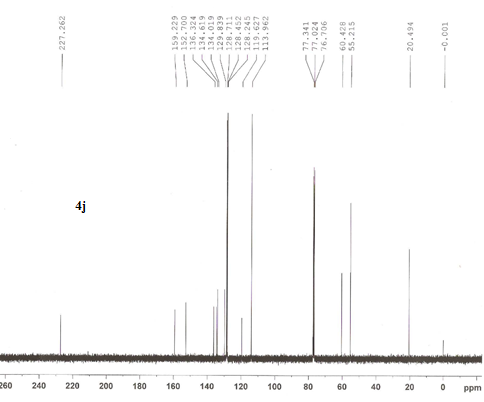


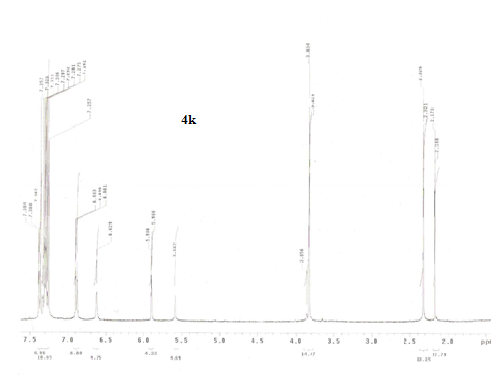


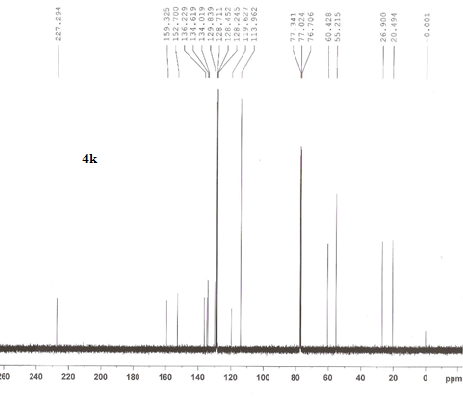

Supplement: Supplementary file 1 [file 12822065]
